# Supplementary material for: Novel transcriptome assembly and improved annotation of the whiteleg shrimp (Litopenaeus vannamei), a dominant crustacean in global seafood mariculture
Source: PubMed Central journal article supplement — Sci Rep. 2014 Nov 25;4:7081. doi: 10.1038/srep07081 (PMC4243063; doi:10.1038/srep07081), 2014-11-25
Supplement: srep07081-s1.pdf [file srep07081-s1.pdf]

## Supplemental Data

### **Novel transcriptome assembly and improved annotation of the whiteleg shrimp (*Litopenaeus vannamei*), a dominant crustacean in global seafood mariculture**

Noushin Ghaffari<sup>1</sup>, Alejandro Sanchez-Flores<sup>2</sup>, Ryan Doan<sup>3</sup>, Karina D. Garcia-Orozco<sup>6</sup>, Patricia L. Chen<sup>4</sup>, Adrian Ochoa-Leyva<sup>5</sup>, Alonso A. Lopez-Zavala<sup>6</sup>, J. Salvador Carrasco<sup>6</sup>, Chris Hong<sup>4</sup>, Luis G. Brieba<sup>7</sup>, Enrique Rudiño-Piñera<sup>8</sup>, Philip D. Blood<sup>9</sup>, Jason A. Sawyer<sup>10</sup>, Charles D. Johnson<sup>1</sup>, Scott V. Dindot<sup>3</sup>, Rogerio R. Sotelo-Mundo<sup>6</sup>, Michael F. Criscitiello<sup>3,4,11</sup>

<sup>1</sup>Genomics and Bioinformatic Services  
Texas A&M AgriLife Research  
College Station, TX 77845 USA

<sup>2</sup>Unidad Universitaria de Apoyo Bioinformático  
Universidad Nacional Autónoma de México  
Cuernavaca, Morelos Mexico

<sup>3</sup>Department of Veterinary Pathobiology  
College of Veterinary Medicine and Biomedical Sciences  
Texas A&M University  
College Station, TX 77843 USA

<sup>4</sup>Comparative Immunogenetics Laboratory  
Department of Veterinary Pathobiology  
College of Veterinary Medicine and Biomedical Sciences  
Texas A&M University  
College Station, TX 77843 USA

<sup>5</sup>Instituto Nacional de Medicina Genómica (INMEGEN)  
Periférico Sur No. 4809, Col. Arenal Tepepan,  
Delegación Tlalpan,  
México, D.F., 14610, Mexico

<sup>6</sup>Centro de Investigación en Alimentación y Desarrollo (CIAD)  
Carretera a Ejido La Victoria, Km 0.6  
Hermosillo, Sonora 83304 Mexico

<sup>7</sup>Laboratorio Nacional de Genómica para la Biodiversidad  
Centro de Investigación y de Estudios Avanzados del IPN  
Irapuato, Guanajuato Mexico

<sup>8</sup>Departamento de Medicina Molecular y Bioprocesos  
Instituto de Biotecnología

Universidad Nacional Autónoma de México  
Cuernavaca, Morelos Mexico

<sup>9</sup>Pittsburgh Supercomputing Center  
Pittsburgh, PA 15213 USA

<sup>10</sup>Department of Animal Sciences  
Texas Agrilife Research  
Texas A&M University  
College Station, TX 77843 USA

<sup>11</sup>Department of Microbial Pathogenesis and Immunology  
College of Medicine  
Texas A&M Health Sciences Center  
Texas A&M University  
College Station, TX 77843 USA

Complete Supplemental data available at:

<http://repository.tamu.edu/handle/1969.1/152151>

Excel Spreadsheets of Supplemental Data 5, 6, and 7, available as separate files.

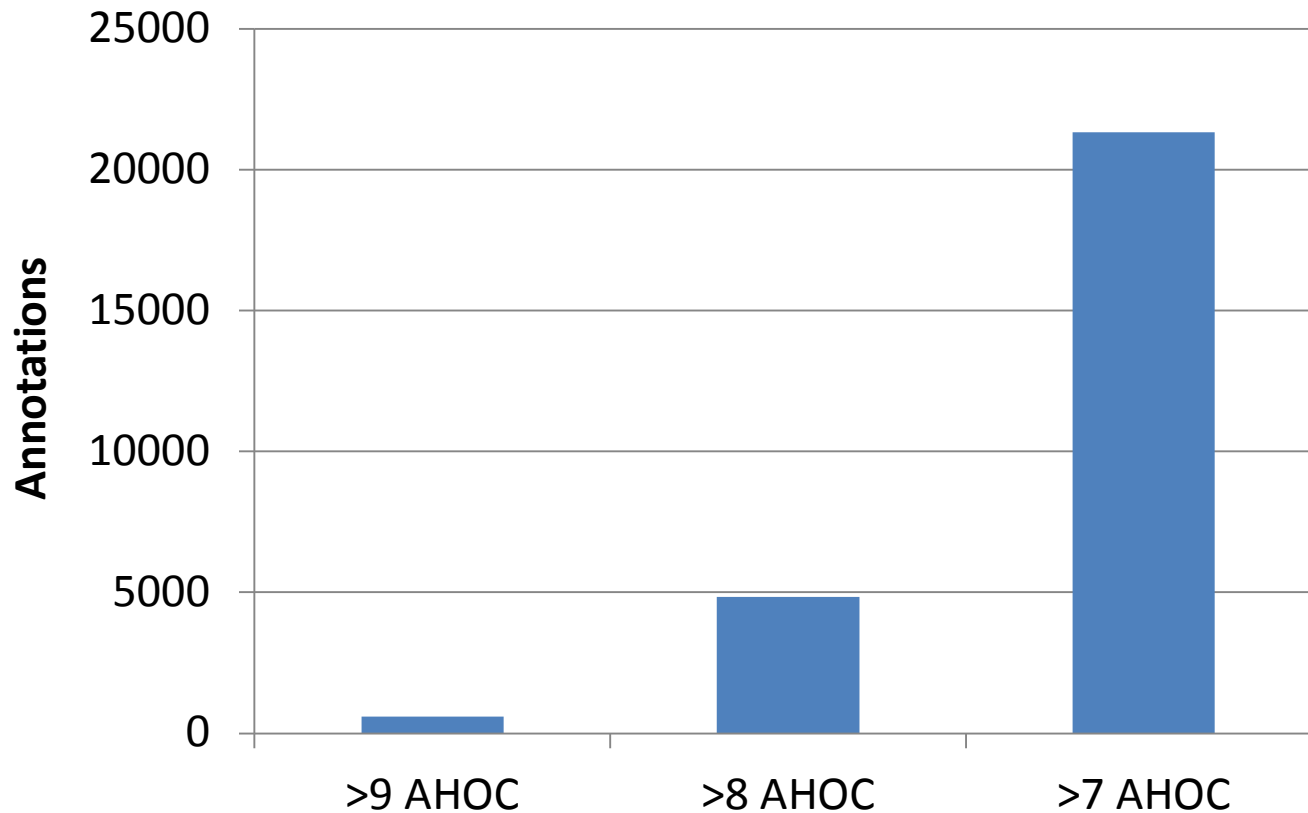

**Supplemental Data 2. AHOC filtering of annotations.** Graphical representation of the AHOC (Annotation Holding Output Column) filtered Trinotate annotation results. Shown are the numbers of contigs matching at least 10, 9 and 8 subjects upon BLAST, these three filtered annotation sets are condensed in Supplemental Data 3.
